# Supplementary material
Source: MDPI journal article supplement (https://www.mdpi.com/2073-4344/4/2/174)

## Supplementary Information

**Figure S1.** Apparent energy barrier due to the temperature-dependent permeability of the oxygen electrode membrane. Pseudo cyclooxygenase reaction rates ( $k_{\text{pseudo}}$ ) were calculated for the temperature range 288–310 K, starting with  $k_{\text{pseudo}} = 1$  at 288 K and using a 3% (circles) or 5% (triangles) temperature coefficient of the  $\text{O}_2$  electrode membrane. The  $\ln k_{\text{pseudo}}$  is plotted vs.  $1/T$  and the plots are approximately linear. The slopes of the linear fits shown reflect the apparent energy barriers due to the temperature dependent permeability of the  $\text{O}_2$  electrode membrane,  $\Delta E_{\text{apparent}} = 17$  kJ/mol (for a 3% temperature coefficient) and 25 kJ/mol (for a 5% temperature coefficient).

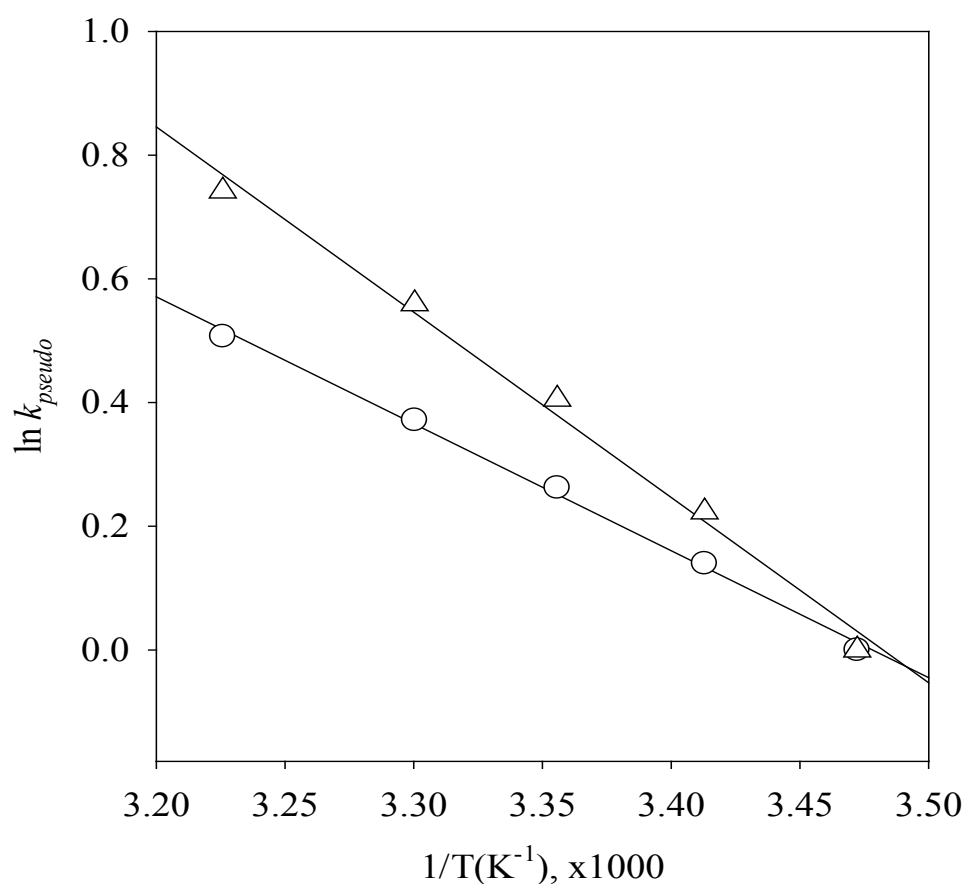

Supplement: s1 [file s1]
